# Supplementary material for: Plastic antibodies tailored on quantum dots for an optical detection of myoglobin down to the femtomolar range
Source: Springer Nature journal article supplement (doi:10.1038/s41598-018-23271-z), 2018-03-15
Supplement: 41598_2018_23271_MOESM1_ESM.pdf [file 41598_2018_23271_MOESM1_ESM.pdf]

# Supplementary Material

to

## **Plastic antibodies tailored on quantum dots for an optical detection of myoglobin down to the femtomolar range**

Ana Margarida Piloto<sup>1)</sup>, David S. M. Ribeiro<sup>2)</sup>, S. Sofia M. Rodrigues<sup>2)</sup>, C. Santos<sup>3,4)</sup>,

João L. M. Santos<sup>2)</sup>, M. Goreti F. Sales<sup>1)\*</sup>

<sup>1</sup>*BioMark /ISEP, School of Engineering of the Polytechnic Institute of Porto, Porto, Portugal*

<sup>2</sup>*LAQV/REQUIMTE, Faculty of Pharmacy of Porto University, Porto, Portugal.*

<sup>3</sup>*EST Setúbal, CDP2T, Instituto Politécnico de Setúbal, Setúbal, Portugal*

<sup>4</sup>*CQE, Instituto Superior Técnico, Universidade de Lisboa, Lisboa, Portugal*

**Table S1.** Polymerization conditions used for the synthesis of the conjugated-QDs, after 1 h Myo imprinting by surface in PBS 10 mM.

| Combination | AAM (M)               | MBA (M)               | Molar ratio<br>(AAM:MBA)/ Myo | Myo (M)                 |
|-------------|-----------------------|-----------------------|-------------------------------|-------------------------|
| 1           | $7.42 \times 10^{-4}$ | $1.63 \times 10^{-4}$ | (5:1)                         | $7.03 \times 10^{-5}$   |
|             |                       |                       |                               | $5.50 \times 10^{-5}$   |
|             |                       |                       |                               | $1.21 \times 10^{-5}$   |
|             |                       |                       |                               | $5.90 \times 10^{-6}$   |
| 2           | $5.30 \times 10^{-4}$ | $2.81 \times 10^{-4}$ | (2:1)                         | $7.03 \times 10^{-5}$   |
|             |                       |                       |                               | $5.50 \times 10^{-5}$ * |
|             |                       |                       |                               | $1.21 \times 10^{-5}$   |
|             |                       |                       |                               | $5.90 \times 10^{-6}$   |
| 3           | $1.06 \times 10^{-4}$ | $9.73 \times 10^{-5}$ | (1:1)                         | $7.03 \times 10^{-5}$   |
|             |                       |                       |                               | $5.50 \times 10^{-5}$   |
|             |                       |                       |                               | $1.21 \times 10^{-5}$   |
|             |                       |                       |                               | $5.90 \times 10^{-6}$   |

\*best analytical performance for MIP-QDs.

**Table S2.** Physical parameters of raw CdTe-MPA QDs in ultra-pure water.

| Particle size diameter<br><i>D</i> (nm) | Molar extinction<br>coefficient, $\epsilon$<br>(L mol <sup>-1</sup> cm <sup>-1</sup> ) | Concentration<br>(mol/L) | $\lambda_{\text{abs}}$<br>(nm) | $\lambda_{\text{em}}$<br>(nm) |
|-----------------------------------------|----------------------------------------------------------------------------------------|--------------------------|--------------------------------|-------------------------------|
| 2.20                                    | 57295                                                                                  | $1.52 \times 10^{-6}$    | 495                            | 544                           |
| 2.48                                    | 74641                                                                                  | $1.85 \times 10^{-6}$    | 505                            | 559                           |
| 2.90                                    | 104797                                                                                 | $1.14 \times 10^{-6}$    | 525                            | 595                           |
| 3.66                                    | 160733                                                                                 | $6.50 \times 10^{-7}$    | 600                            | 658                           |

The diameter, *D*, calculation was supported by the following reference:

Yu, W.W., Qu, L.H., Guo, W.Z., Peng, X.G., 2003. Experimental determination of the extinction coefficient of CdTe, CdSe, and CdS nanocrystals. *Chem Mater* 15(14), 2854-2860.

**Table S3.** Analytical parameters determined upon incubation of Myo standards in PBS 10mM.

| Analytical Feature                        | MIP-QDs                |                        |                        |                        | NIP-QDs                |                        |                        |                        | Raw QDs                |                        |
|-------------------------------------------|------------------------|------------------------|------------------------|------------------------|------------------------|------------------------|------------------------|------------------------|------------------------|------------------------|
|                                           | Bulk                   | Surface                | Bulk                   | Surface                | Bulk                   | Surface                | Bulk                   | Surface                | —                      | —                      |
| <i>Imprinting strategy</i>                | Bulk                   | Surface                | Bulk                   | Surface                | Bulk                   | Surface                | Bulk                   | Surface                | —                      | —                      |
| <i>Incubation (min.)</i>                  | 5                      | 5                      | 30                     | 30                     | 5                      | 5                      | 30                     | 30                     | 5                      | 30                     |
| <i>LLLR (mol/L)</i>                       | $8.78 \times 10^{-13}$ | $2.77 \times 10^{-13}$ | $5.68 \times 10^{-14}$ | $5.06 \times 10^{-14}$ | $8.78 \times 10^{-13}$ | $1.40 \times 10^{-12}$ | $2.83 \times 10^{-13}$ | $3.24 \times 10^{-13}$ | $1.95 \times 10^{-10}$ | $2.42 \times 10^{-11}$ |
| <i>ULLR (mol/L)</i>                       | $1.52 \times 10^{-10}$ | $2.58 \times 10^{-10}$ | $5.10 \times 10^{-11}$ | $9.50 \times 10^{-11}$ | $4.57 \times 10^{-9}$  | $1.54 \times 10^{-9}$  | $4.53 \times 10^{-10}$ | $6.33 \times 10^{-10}$ | $4.47 \times 10^{-8}$  | $4.27 \times 10^{-9}$  |
| <i>LOD (mol/L)</i>                        | $9.19 \times 10^{-14}$ | $8.15 \times 10^{-14}$ | $1.22 \times 10^{-14}$ | $7.55 \times 10^{-15}$ | $2.58 \times 10^{-13}$ | $1.66 \times 10^{-12}$ | $2.07 \times 10^{-13}$ | $1.39 \times 10^{-13}$ | $3.76 \times 10^{-11}$ | $1.68 \times 10^{-12}$ |
| <i>Imprinting factor</i>                  | 1.24                   | 1.28                   | 1.23                   | 1.34                   | —                      | —                      | —                      | —                      | —                      | —                      |
| <i>Stern Volmer (<math>K_{sv}</math>)</i> | 0.271                  | 0.269                  | 0.225                  | 0.271                  | 0.219                  | 0.211                  | 0.183                  | 0.202                  | 0.234                  | 0.259                  |

ULLR: Upper Limit of Linear Range; LLLR: Lower Limit of Linear Range; LOD: Limit of Detection.

## Dynamic light scattering analysis

The measurements conditions for size are:

Dispersant: ultra-pure water

Measurement mode: nano Analysis Mode

Scan settings: Noise Cut Set

Run Duration: 240s

ND Filter: Auto

Detector position: Auto

Calculation: Standard Monodisperse

The DLS analysis resultant from low sampling time (320ns) with the size distribution computed in number base distribution is depicted in figure S1.

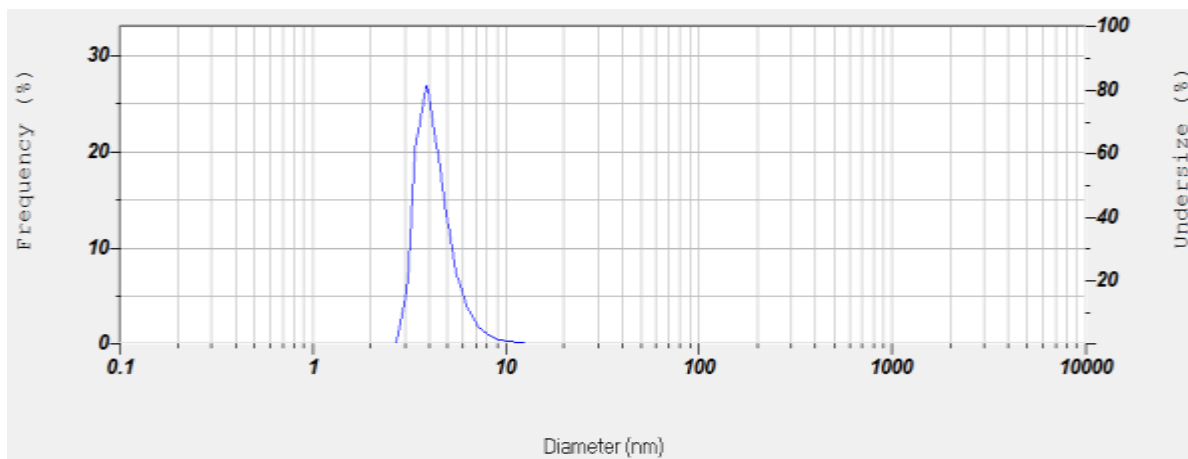

**Figure S1.** DLS spectra of red raw QDs in ultra-pure water. The average size of the particles is estimated in 4.1 nm.

## Zeta potential ( $\zeta$ ) analysis

Diluted solutions of red raw QDs were used to determine the zeta potential. A homogeneous distribution of raw-QDs sizes was evidenced, according to the zeta potential distribution. The value of  $-32,6\text{mV}$  obtained confirmed the negative charged surface of the QDs.

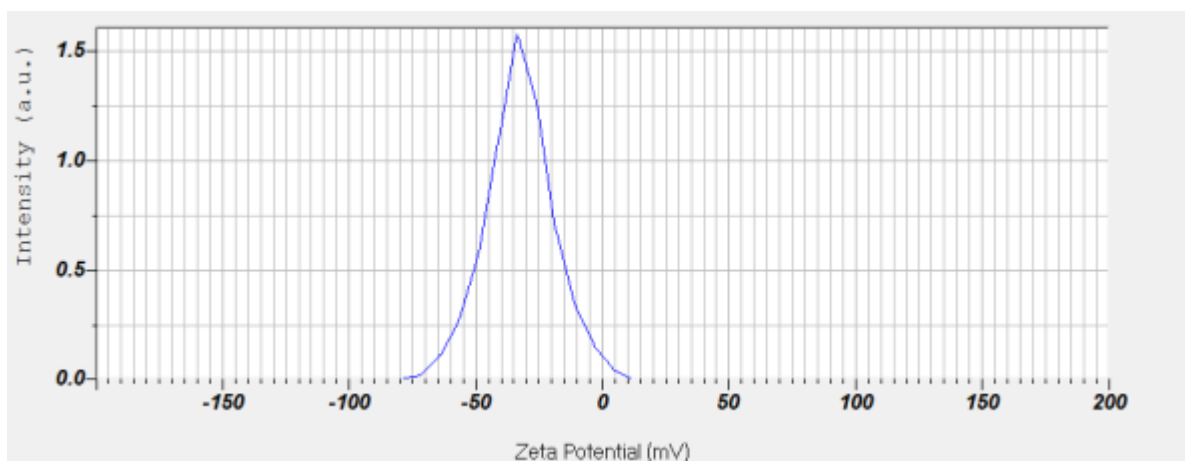

**Figure S2.** Zeta potential distribution of red CdTe-MPA QDs in ultra-pure water.

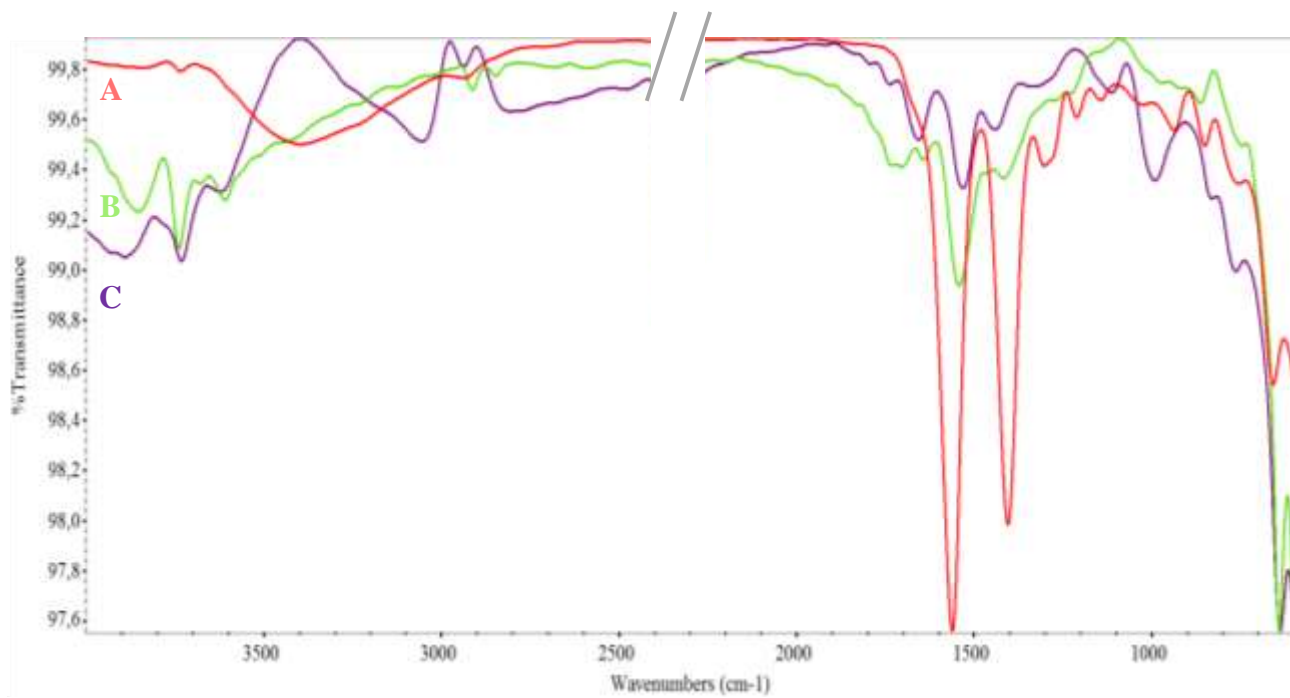

**Figure S3.** FTIR spectra of (A) raw CdTe-MPA QDs, (B) MIP-QDs and (C) NIP-QDs.

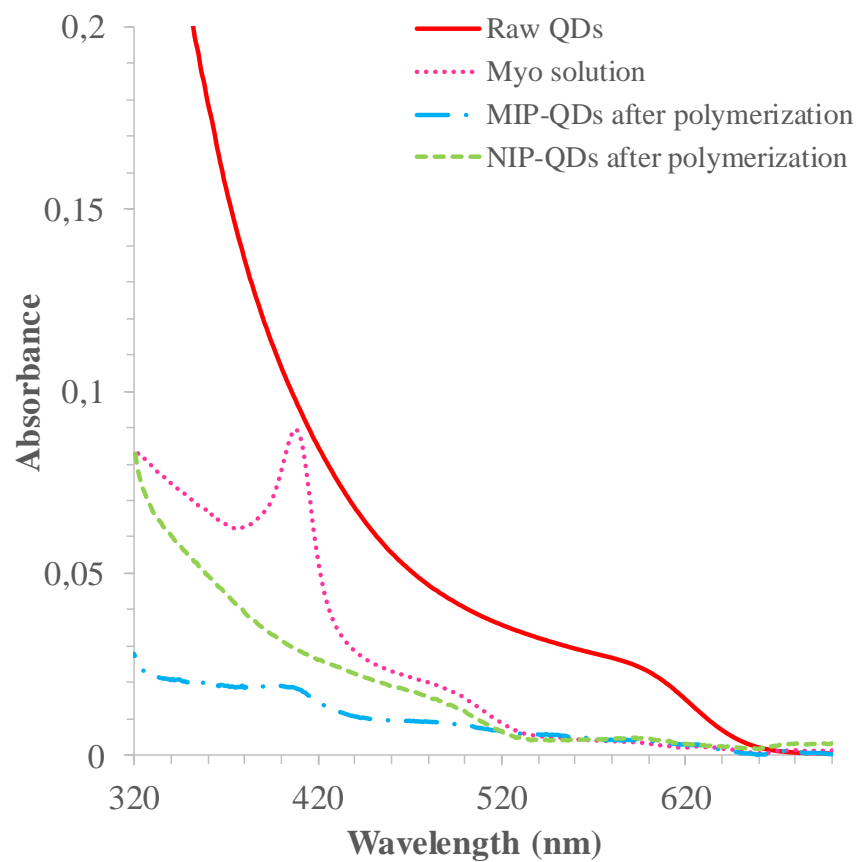

**Figure S4.** UV-Vis absorption spectra of the myoglobin imprinting solution and of the CdTe-MPA QDs suspended in PBS 10mM.



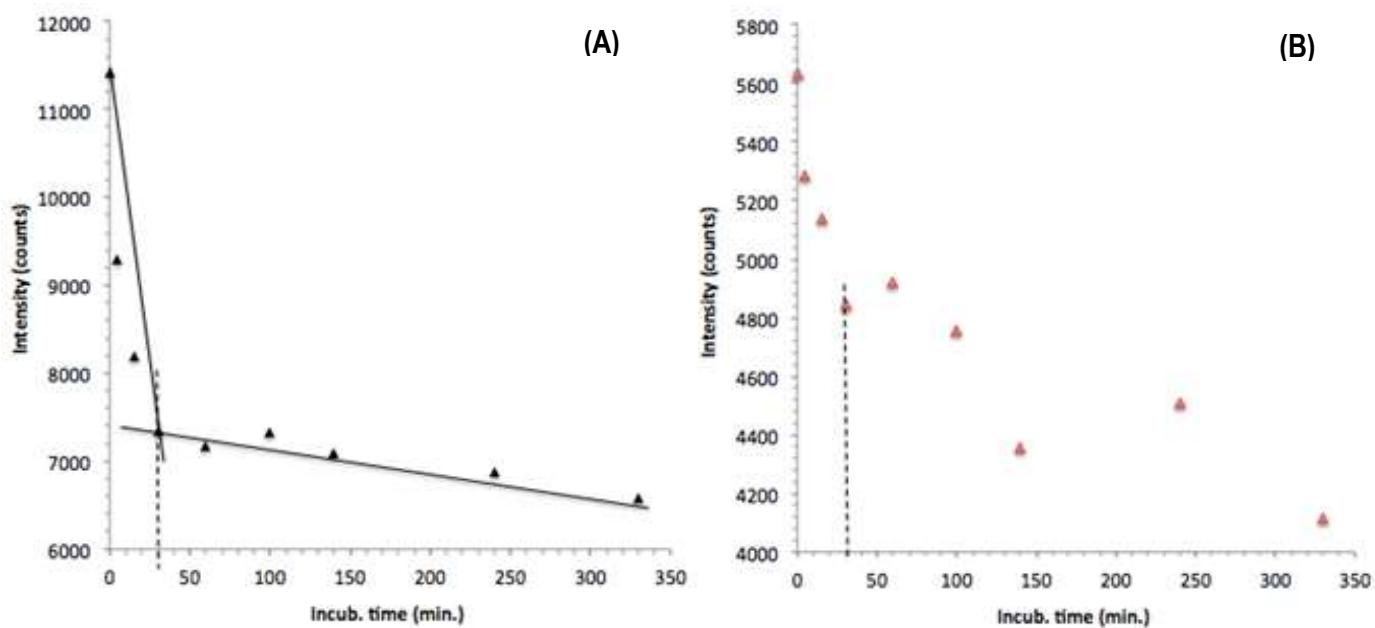

**Figure S5.** Adsorption kinetics of a Myo standard solution 1.5 nM, with increasing incubation times. (A) MIP-QDs and (B) NIP-QDs, prepared by surface imprinting strategy (PBS 10mM, r.t.).

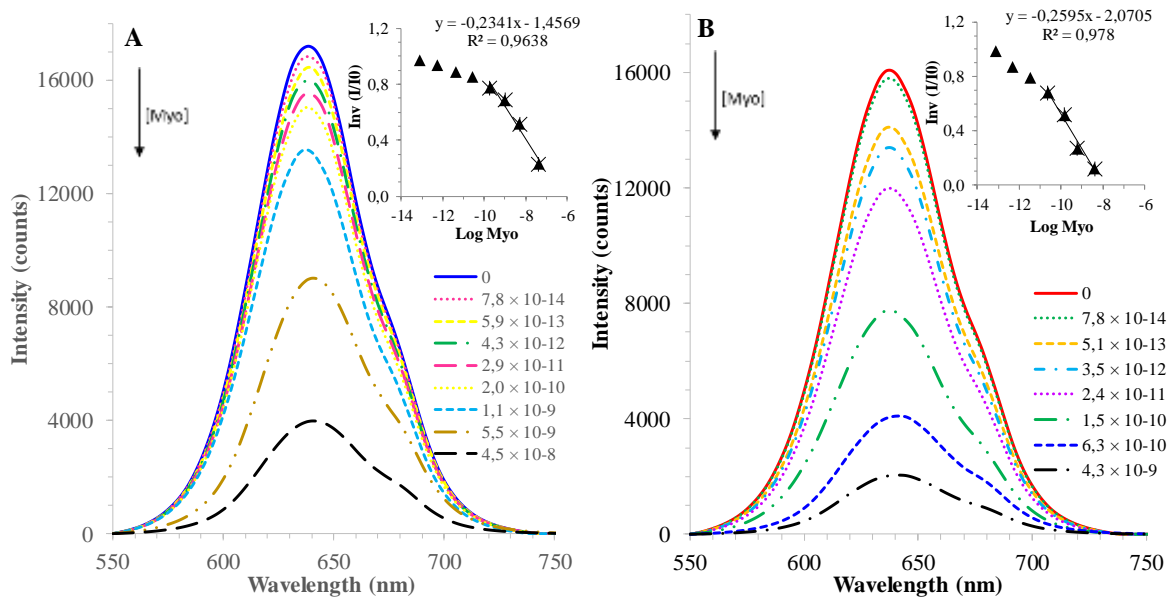

**Figure S6.** Fluorescence emission spectra of raw QDs, with addition of increasing concentrations of Myo standards. (A) after 5 min incubation; (B) after 30 min incubation, in PBS 10mM. Inset: The correspondent Stern-Volmer plot.

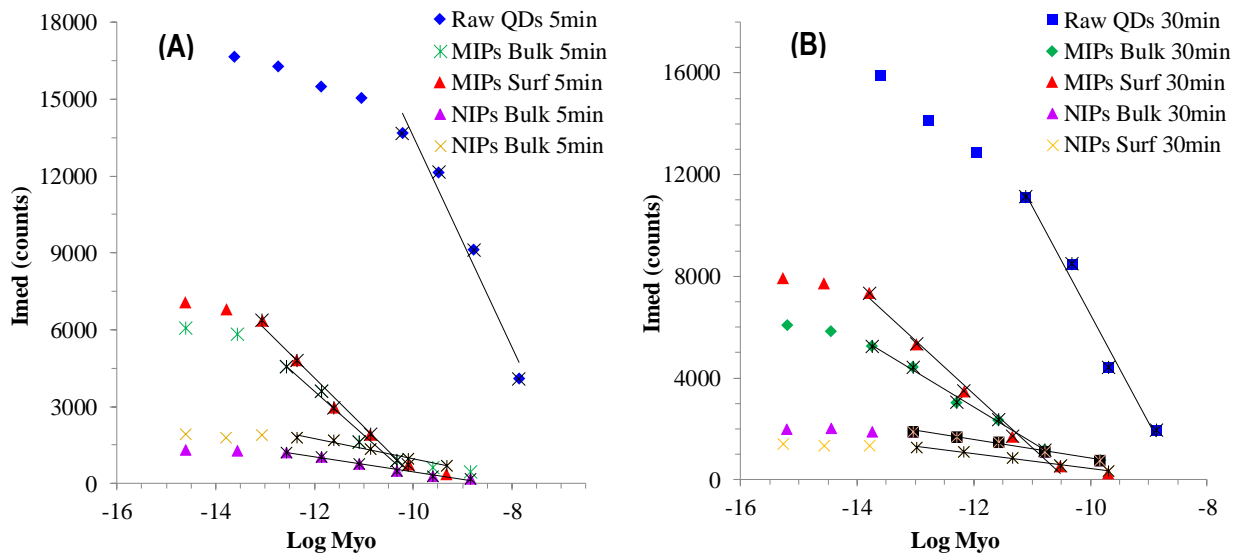

**Figure S7.** Comparative performances of raw QDs and conjugated-QDs using bulk and surface imprinting strategies, after incubation with Myo standards in PBS 10mM, for 5 min (left) and 30 minutes (right).

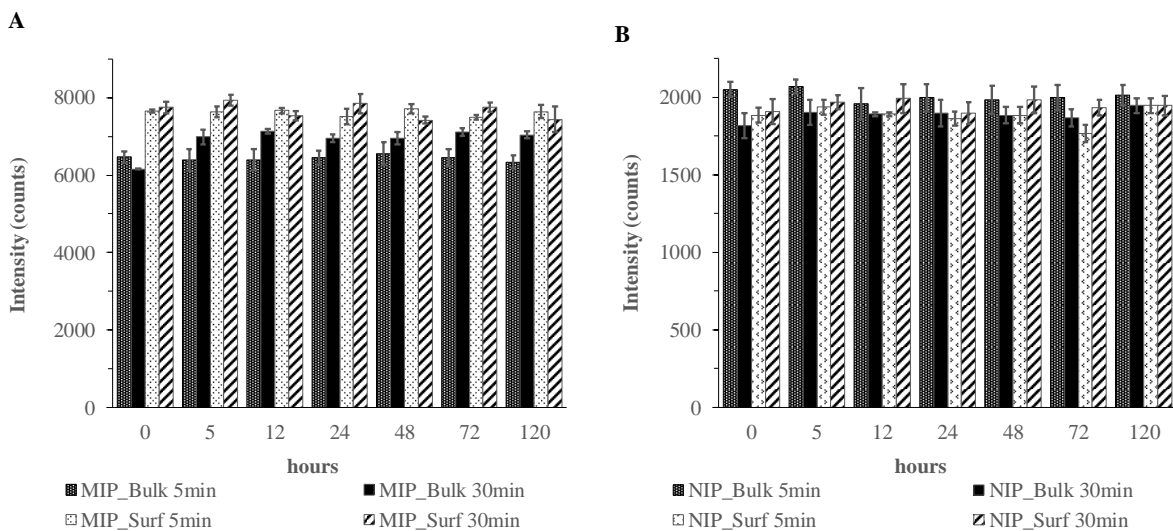

**Figure S8.** Fluorescence stability of the as-prepared MIP-based QDs (A) and NIP-based QDs (B), prepared by several imprinting strategies, prior to myoglobin standards calibrations, upon 5 days storage at 4°C.

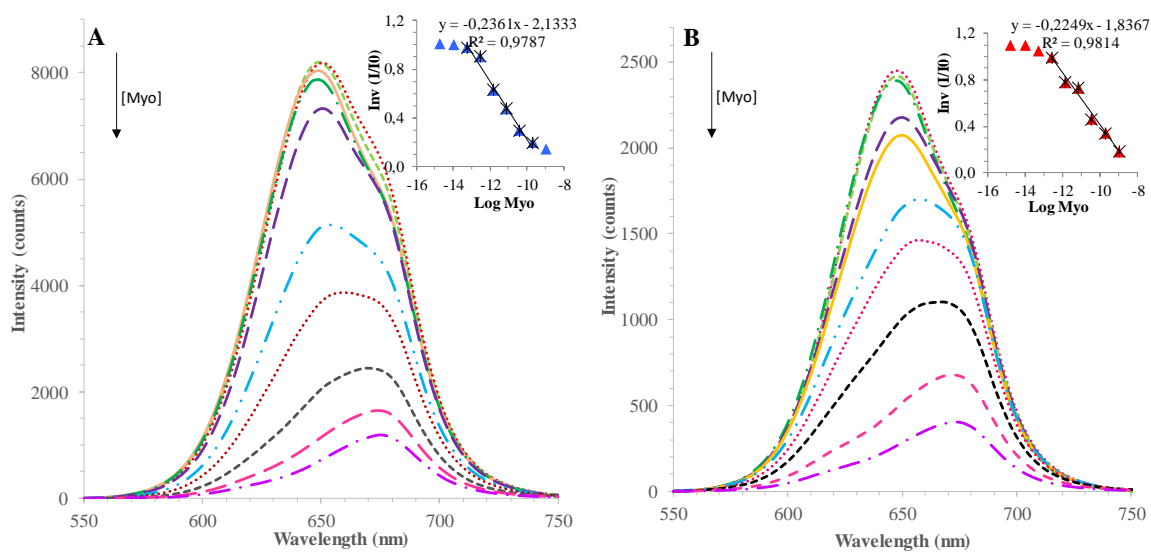

**Figure S9.** Fluorescence emission spectra from the selectivity test of MIP-QDs (A) and NIP-QDs (B), prepared by surface imprinting, with addition of increasing concentration of Myo standards (30 min incubation), in a 1000-fold diluted synthetic human serum sample. Inset: The correspondent Stern-Volmer plots.

**Table S4.** Spiked concentrations of Myo obtained with MIP- or NIP-based QDs, in a 1000× diluted serum (experimental errors indicated in %).

| Spiked myoglobin concentration<br>(g/ml) | Calculated myoglobin concentration (g/ml) |                                   |
|------------------------------------------|-------------------------------------------|-----------------------------------|
|                                          | MIP                                       | NIP                               |
| $2.28 \times 10^{-12}$                   | $1.83 \times 10^{-12} \pm 19.9\%$         | $4.66 \times 10^{-13} \pm 79.5\%$ |
| $1.60 \times 10^{-10}$                   | $1.96 \times 10^{-10} \pm 22.6\%$         | $3.92 \times 10^{-11} \pm 75.4\%$ |
| $2.48 \times 10^{-9}$                    | $2.77 \times 10^{-9} \pm 11.6\%$          | $5.47 \times 10^{-10} \pm 78.0\%$ |
